# Supplementary material
Source: publisher site journal article supplement (https://www.spandidos-publications.com/4588/downloadSupplementary)

Figure S1. The image of excised tumours and the tumours on mice. The excised tumour image was captured at 4 weeks after initial treatment. Some photos were missing in case of early death. In the mice images, some animals showed metastatic lesion on the back. Tumour dimensions are presented in Table I.

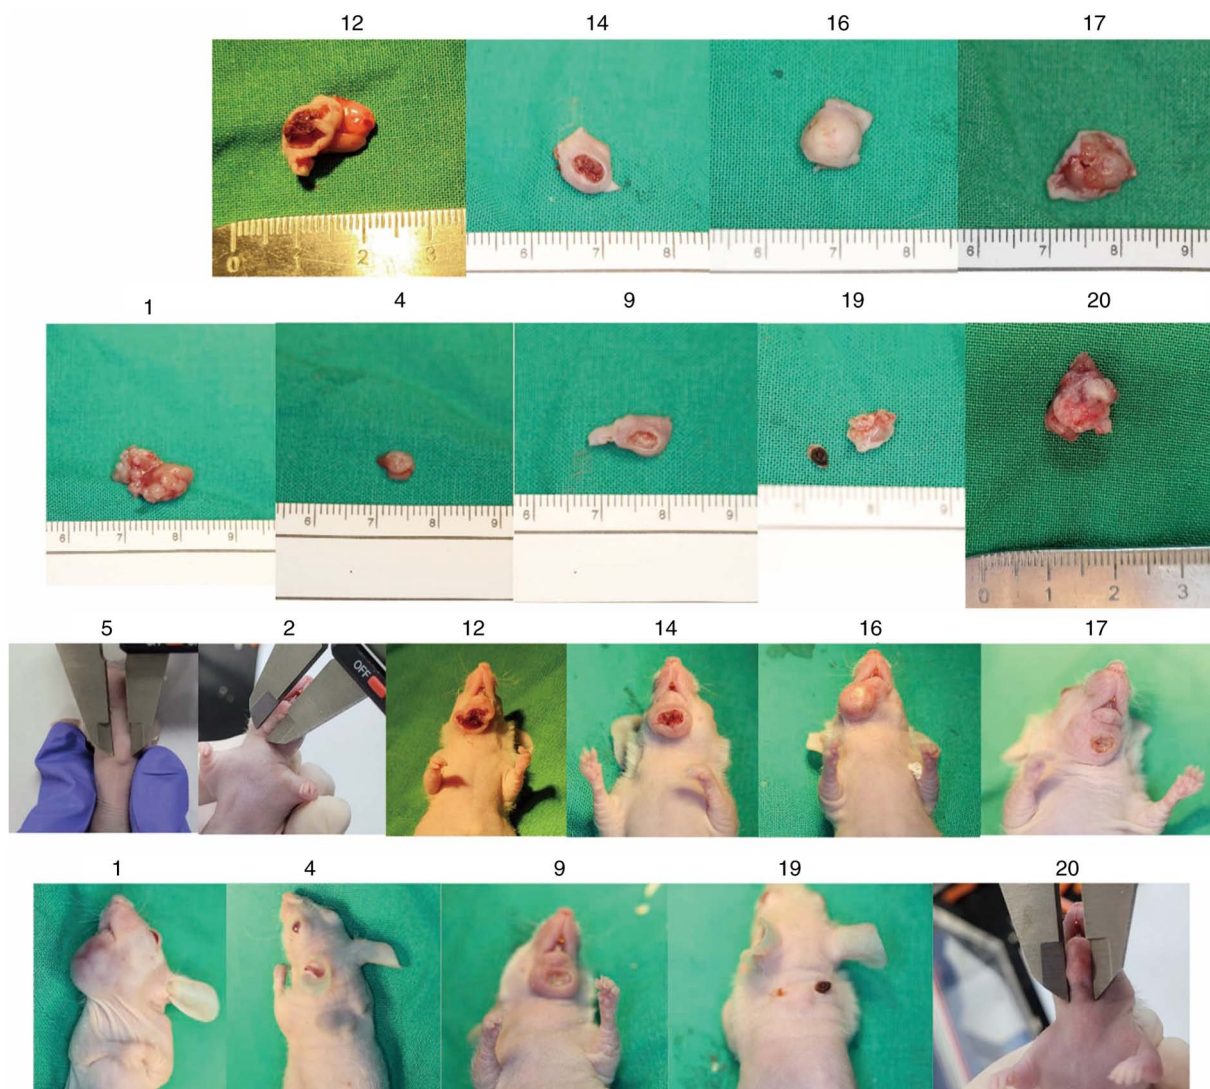

Supplement: Supplementary file 1 [file downloadSupplementary]
